# Supplementary material
Source: PubMed Central journal article supplement (PMC3321809)
Supplement: 11_149_Patsenker_Suppl.pdf [file 11_149_Patsenker_Suppl.pdf]

**Supplementary Figure 1.** *The effects of endo- and exocannabinoids on HSC proliferation and apoptosis.* (A) LDH leakage after 48 h, (B) DNA synthesis (BrdU incorporation) and (C) caspase-3 and bax, measured by Western Blotting after 24 h treatment with 2-AG or THC alone, or in combination with AA (means  $\pm$  SD).

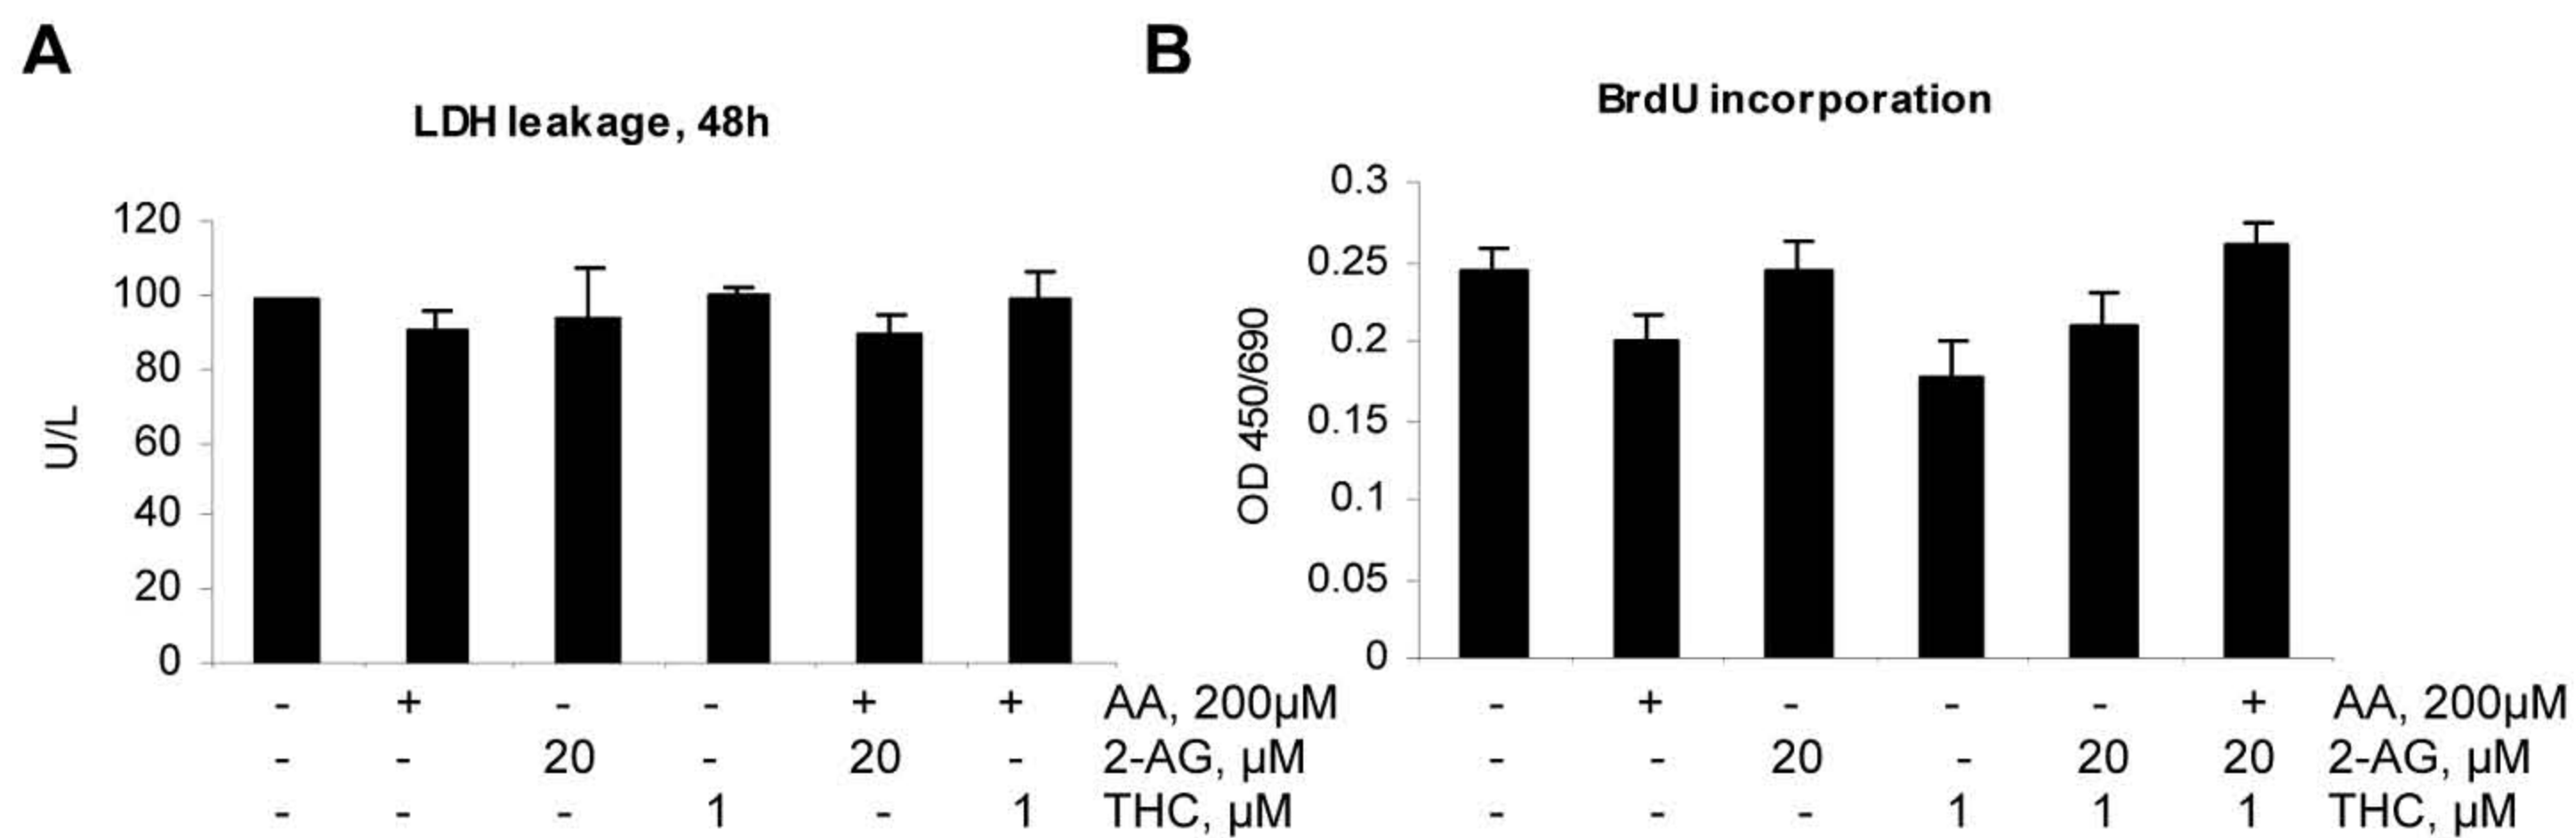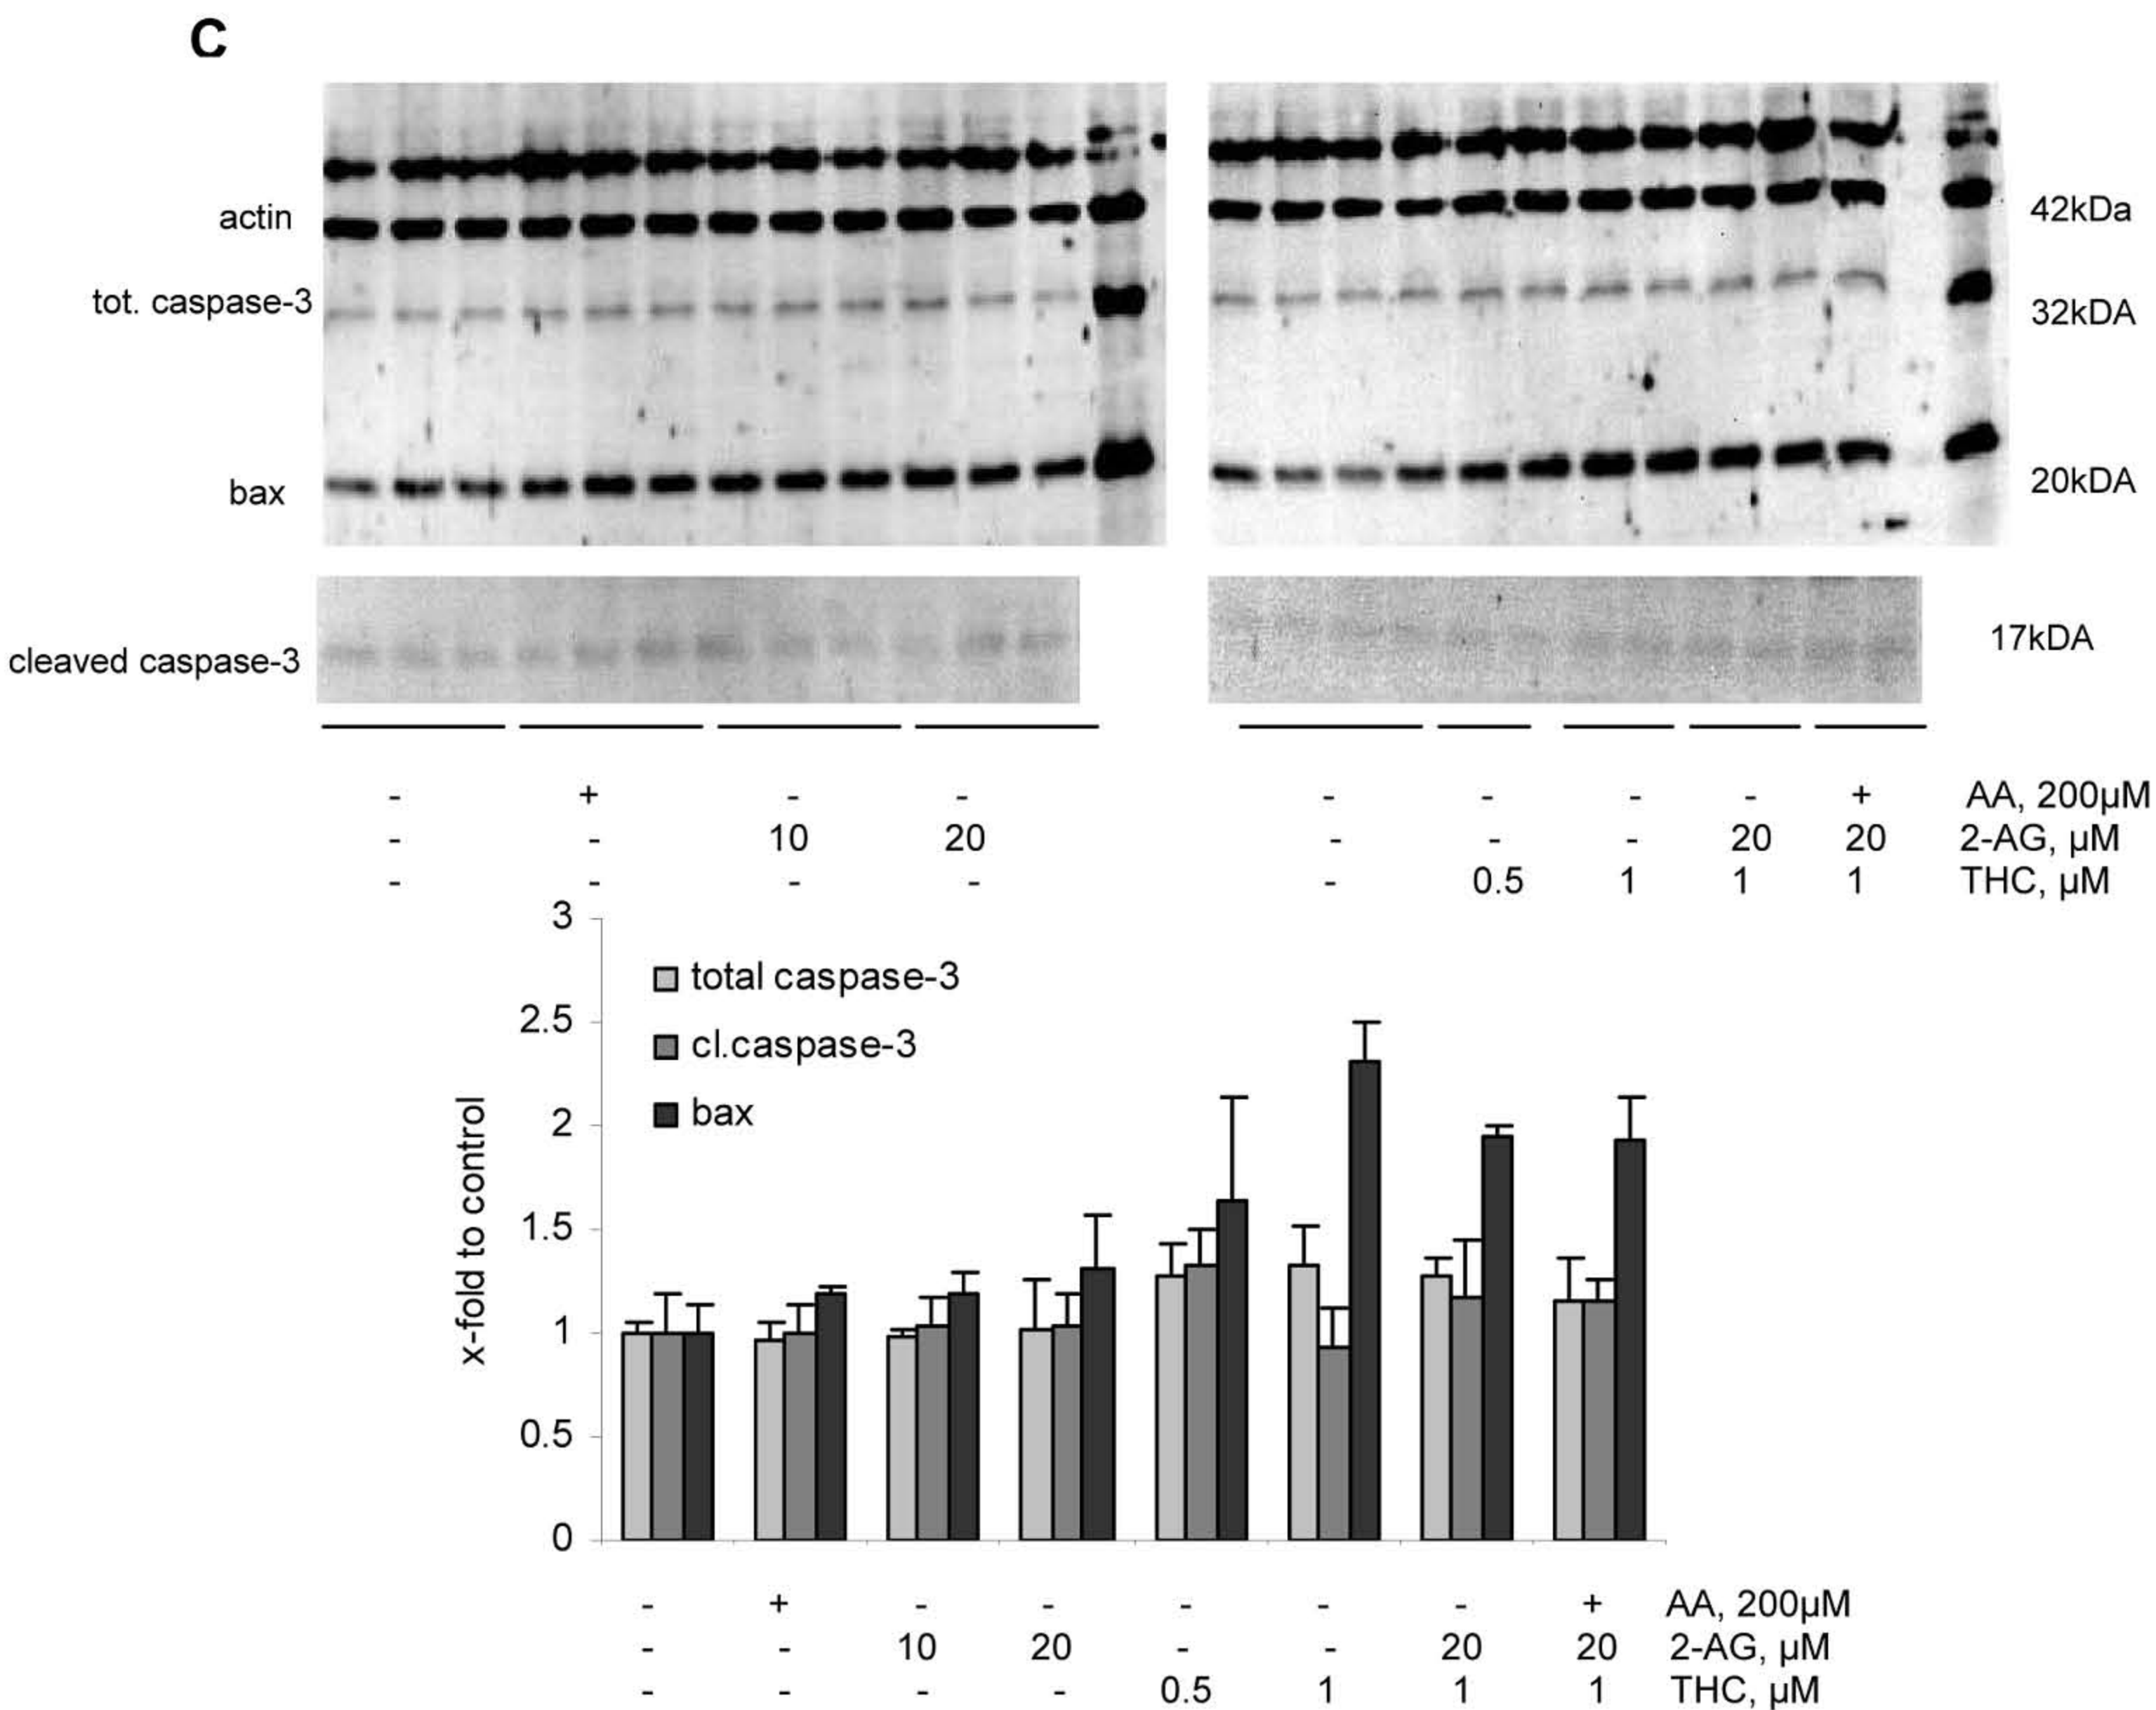

**Supplementary Figure 2.** *The effect of EtOH on HSC gene expression. CB1, PC $\alpha$ 1(I) and  $\alpha$ SMA mRNA expression, measured by TaqMan PCR and normalized to GAPDH. (means  $\pm$  SD).*

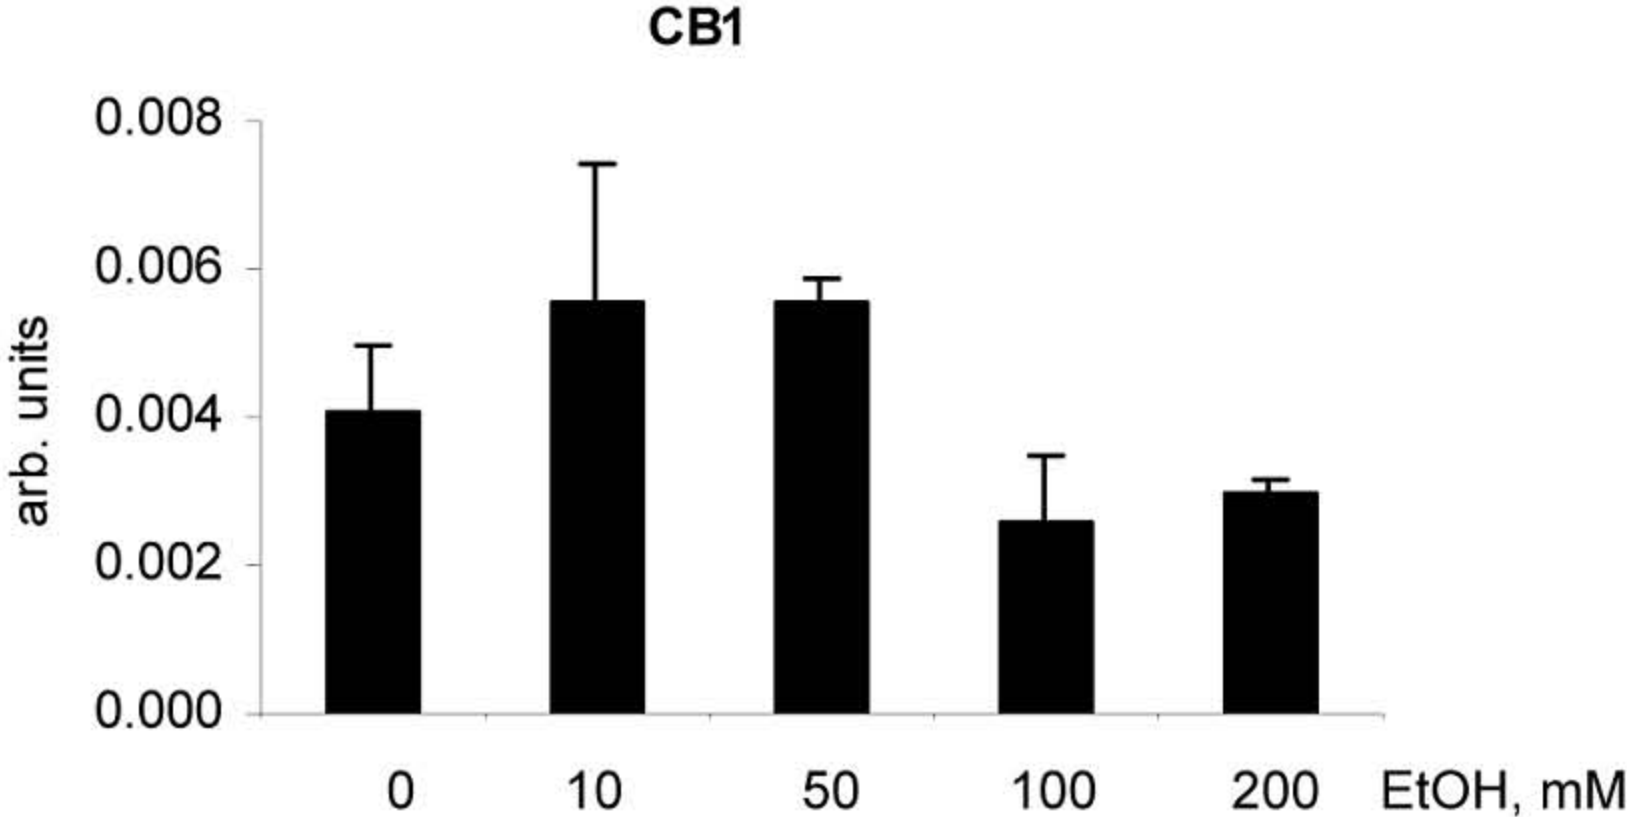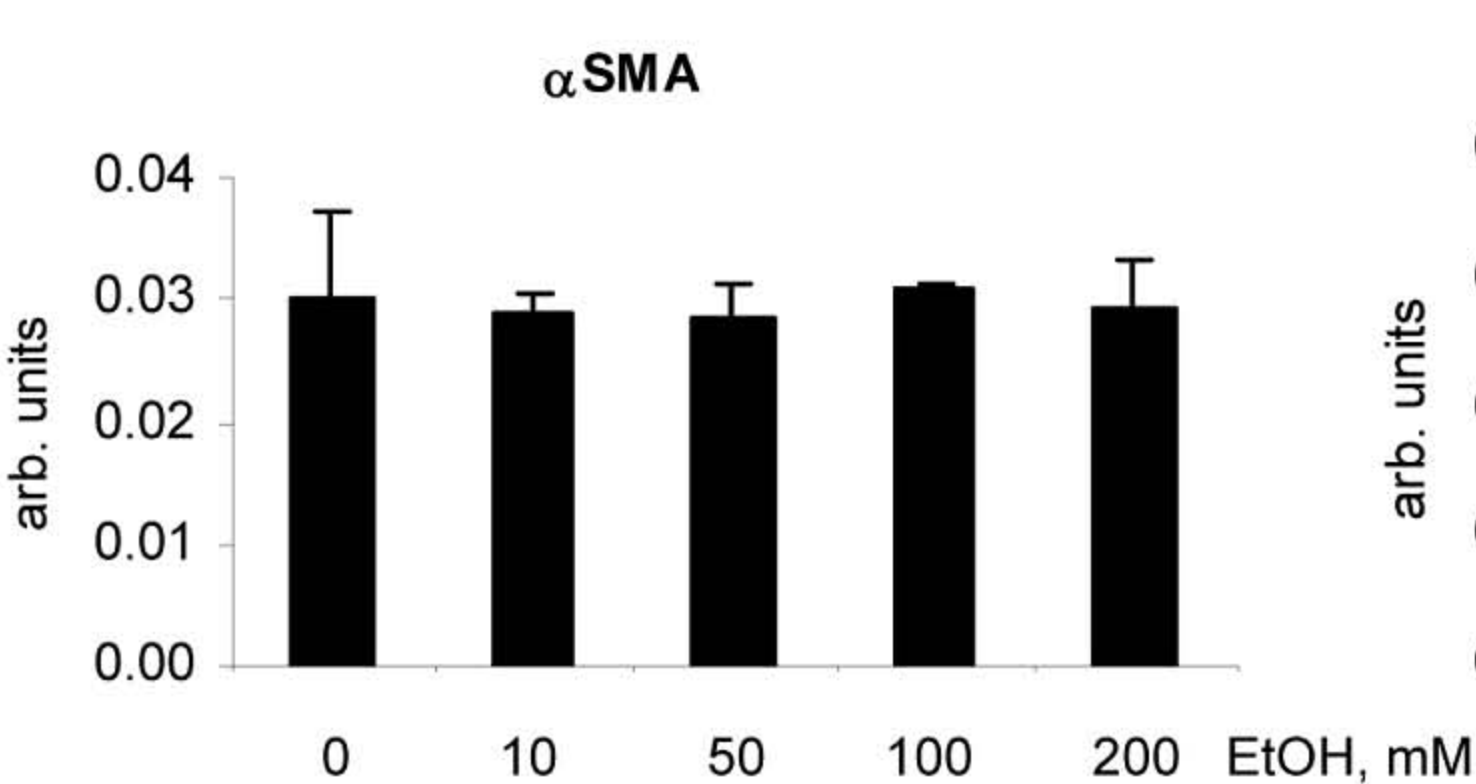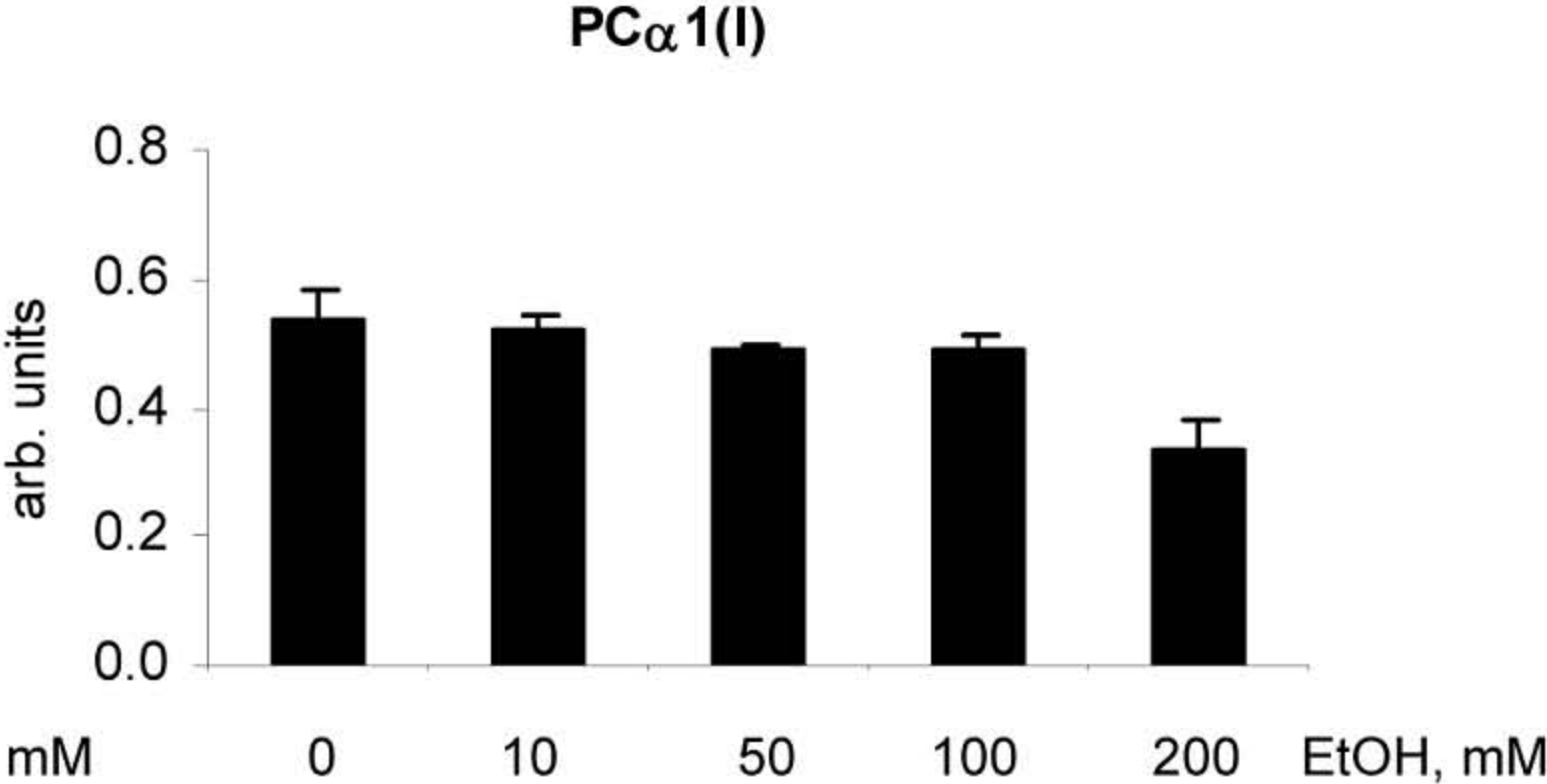

**Supplementary Table 1** Primers and probes used for TaqMan PCR

| Target gene*                          | 5'-Primer                  | Probe                             | 3'-Primer                |
|---------------------------------------|----------------------------|-----------------------------------|--------------------------|
| <b>CB1</b> (h)                        | TCCGCATGATTGAGCGTG         | CCCAGAAGAGCATCATCATCACACG         | ACCTGTACCTTCCCATCTCA     |
| <b>CB1</b> (r)                        | GACTTCCATGTATTCCACCGTAAAG  | CAGCCCCAATGTGTTTCTGTC             | GGCTGTAACCCACCCAGTT      |
| <b>CB2</b> (h)                        | CCGCCATTGACCGATACCT        | TGCCTGCGCTATCCACCTTC              | ACGGGTGAGCAGAGCTTTGT     |
| <b>PC <math>\alpha</math>1(I)</b> (h) | CAGCCGCTTCACCTACAG         | TGGCTGCACGAGTCACACCCGG            | GGTTTTGTATTCAATCACTGTCTT |
| <b>PC <math>\alpha</math>1(I)</b> (m) | TCCGGCTCCTGCTCCTCTTA       | TTCTTGGCCATGCGTCAGGAGGG           | GTATGCAGCTGACTTCAGGGATGT |
| <b>PC <math>\alpha</math>1(I)</b> (r) | TCCGGCTCCTGCTCCTCTTA       | TTCTTGGCCATGCGTCAGGAGGG           | GTATGCAGCTGACTTCAGGGATGT |
| <b><math>\alpha</math>SMA</b> (r)     | GCTGACAGGATGCAGAAGGA       | CACCATGAAGATCAAGATTATTGCTCCTCCAG  | GCCGATCCAGACAGAAATTTTG   |
| <b><math>\alpha</math>SMA</b> (m)     | ACAGCCCTCGCACCCCA          | CAAGATCATTGCCCTCCAGAACGC          | GCCACCGATCCAGACAGAGT     |
| <b>TIMP-1</b> (m)                     | TCCTCTTGTTGCTATCCTGATAGCTT | TTCTGCAACTCGGACCTGGTCATAAGG       | CGCTGGTATAAGGTGGTCTCGTT  |
| <b>TIMP-1</b> (r)                     | TCCTCTTGTTGCTATCCTGATAGCTT | TTCTGCAACTCGGACCTGGTATAAGG        | CGCTGGTATAAGGTGGTCTCGAT  |
| <b>TGF<math>\beta</math>1</b> (m)     | AGAGGTCACCCGCGTGCTAA       | ACCGCAACAACGCCATCTATGAGAAAACCA    | TCCCGAATGTCTGACGTATTGA   |
| <b>TGF<math>\beta</math>1</b> (r)     | AGAAGTCACCCGCGTGCTAA       | ACCGCAACAACGCAATCTATGACAAAACCA    | TCCCGAATGTCTGACGTATTGA   |
| <b>MMP-3</b> (m)                      | GATGAACGATGGACAGAGGATG     | TGGTACCAACCTATTCTGTGTTGCTGC       | AGGGAGTGGCCAAGTTCATG     |
| <b>MMP-2</b> (m)                      | CCGAGGACTATGACCGGGATAA     | TCTGCCCGAGACCGCTATGTCCA           | CTTGTTGCCAGGAAAGTGAAG    |
| <b>MMP-13</b> (m)                     | GGAAGACCCTCTTCTCTCT        | TCTGGTTAACATCATCATACTCCACACGT     | TCATAGACAGCATCTACTTTGTT  |
| <b>COX-2</b> (m)                      | CAAGCAGTGGCAAAGGCCT        | CATTGACCAGAGCAGAGAGATGAAATACCAGTC | GCGTTTGCGGTACTCATTGA     |
| <b>TNF<math>\alpha</math></b> (m)     | GACCAGGCTGTGCTACATCA       | TGAACCTCTGCTCCCCACGGGA            | GTAGGGCGATTACAGTCAACGG   |
| <b>iNOS</b> (m)                       | GGCAGCCTGTGAGACCTTTG       | TGTCCGAAGCAAACATCACATTCAGATCC     | TTGCATTGGAAGTGAAGCGTT    |
| <b>GAPDH</b> (h)                      | CCAGGAAATGAGCTTGACAAAGTT   | TCGTTGAGGGCAATGCCAGCC             | CTCCTCCACCTTTGACCGCTG    |
| <b>GAPDH</b> (r)                      | CTGCCAAGTATGATGACATCAAGAA  | TCGGCCGCCTGCTTCACCA               | AGCCCAGGATGCCCTTTAGT     |
| <b>GAPDH</b> (m)                      | ACTGGCATGGCCTTCCG          | TTCTACCCCCAATGTGTCCGTCGT          | CAGGCGGCACGTCAGATC       |

**Abbreviations:**  $\alpha$ SMA – alpha smooth muscle actin; CB1/2 – cannabinoid receptors 1 and 2; COX-2 – cyclooxygenase-2; iNOS – inducible nitric oxide synthase; GAPDH -

glyceraldehyd-3-phosphat-dehydrogenase; MMP – matrix metalloproteinase; PC  $\alpha$ 1(I)  
– procollagen alpha 1(I); TIMP-1 – tissue inhibitor of matrix metalloproteinase-1; TGF $\beta$   
– transforming growth factor beta; TNF $\alpha$  – tumor necrosis factor alpha.

\*CTGF (connective tissue growth factor), PDGF (platelet derived growth factor) and  
MMP-9 - ready to use kits from Qiagen (Hilden, Germany) for which the sequences were  
not provided.
